# Supplementary material for: Silver(I) complexes with quinoline based linear multidentate ligands: self-assembly of sulfur-bridged tetrametallotricyclic boxes †
Source: Royal Society of Chemistry journal article supplement (doi:10.1039/b001723j), 2000-01-01
Supplement: b001723j.doc [file b001723j.doc]

# Electronic Supplementary Information

# Fig. S1-7. Electrospray mass spectra recorded in MeOH-MeCN solution: (s1) 1:1 AgClO4-ODSQ mixture; (s2) 3:1 AgClO4-OESQ mixture; (s3) 1:1 AgNO3-OESQ mixture; (s4) 2:1 AgNO3-OESQ mixture; (s5) 1:1 AgNO3-ODSQ mixture; (s6) 2:1 AgNO3-ODSQ mixture; (s7) 2:1:1 AgNO3-OESQ-ODSQ mixture.


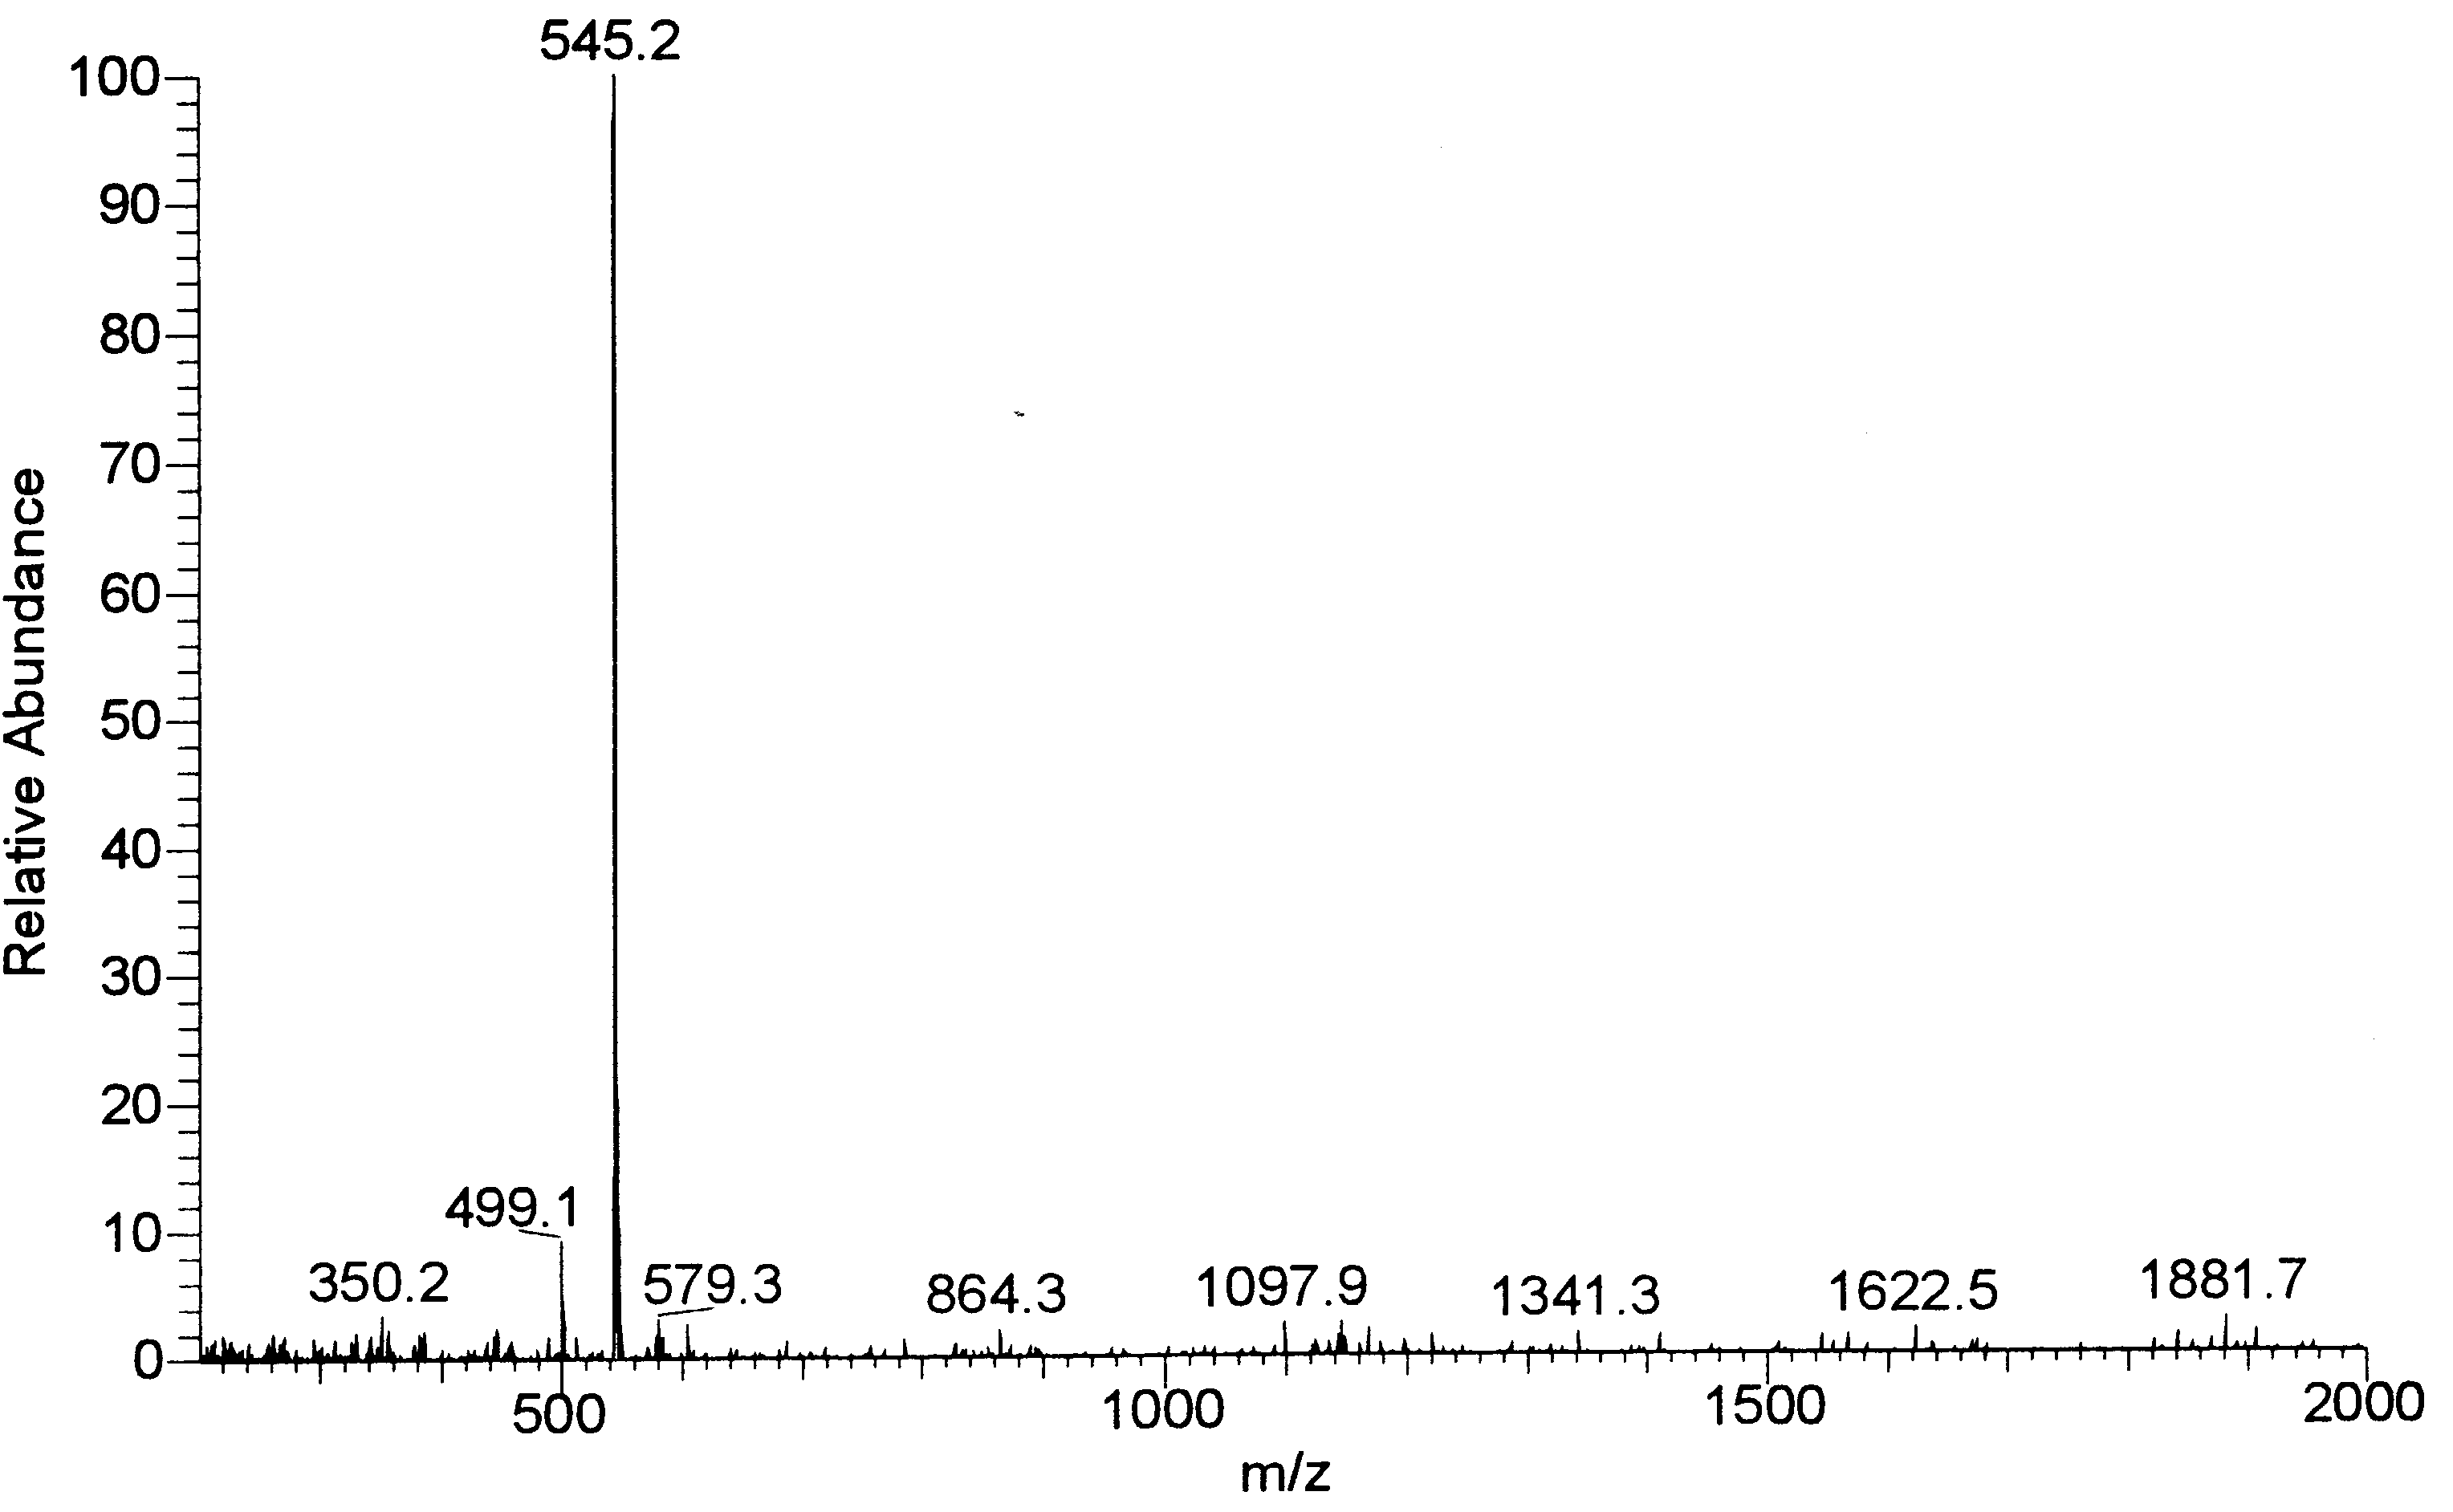
 (s1)


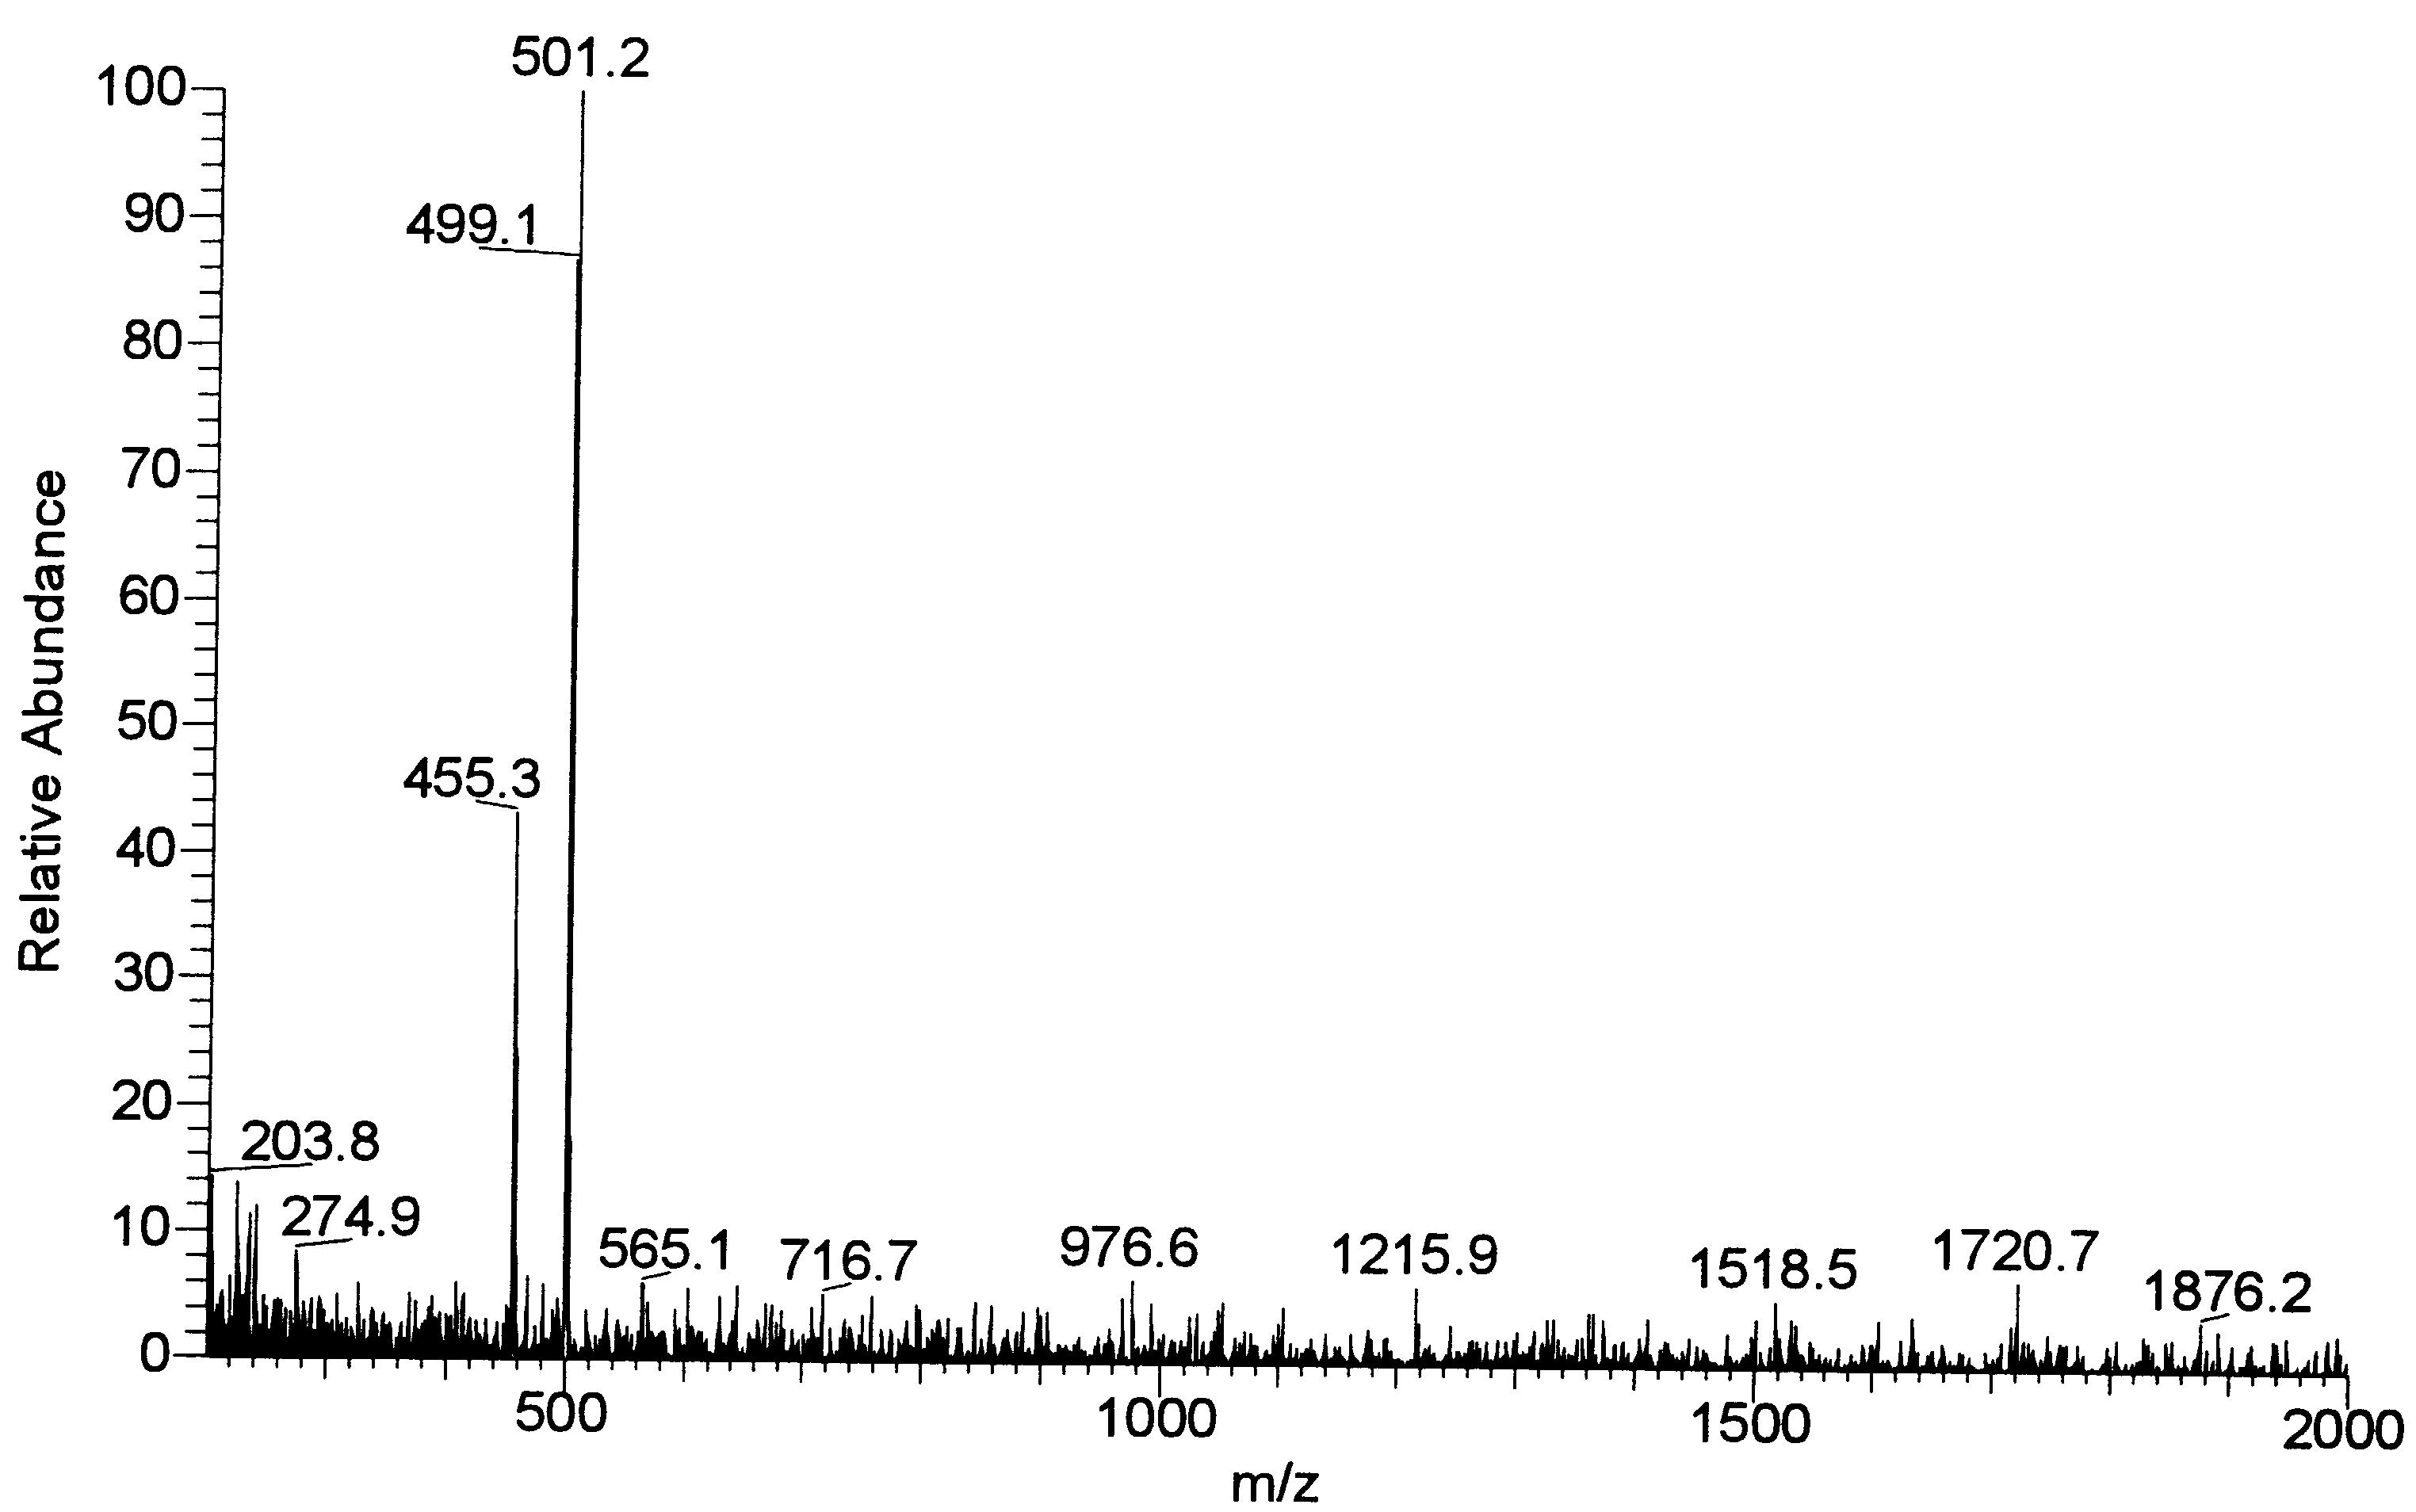
 (s2)

(s3)


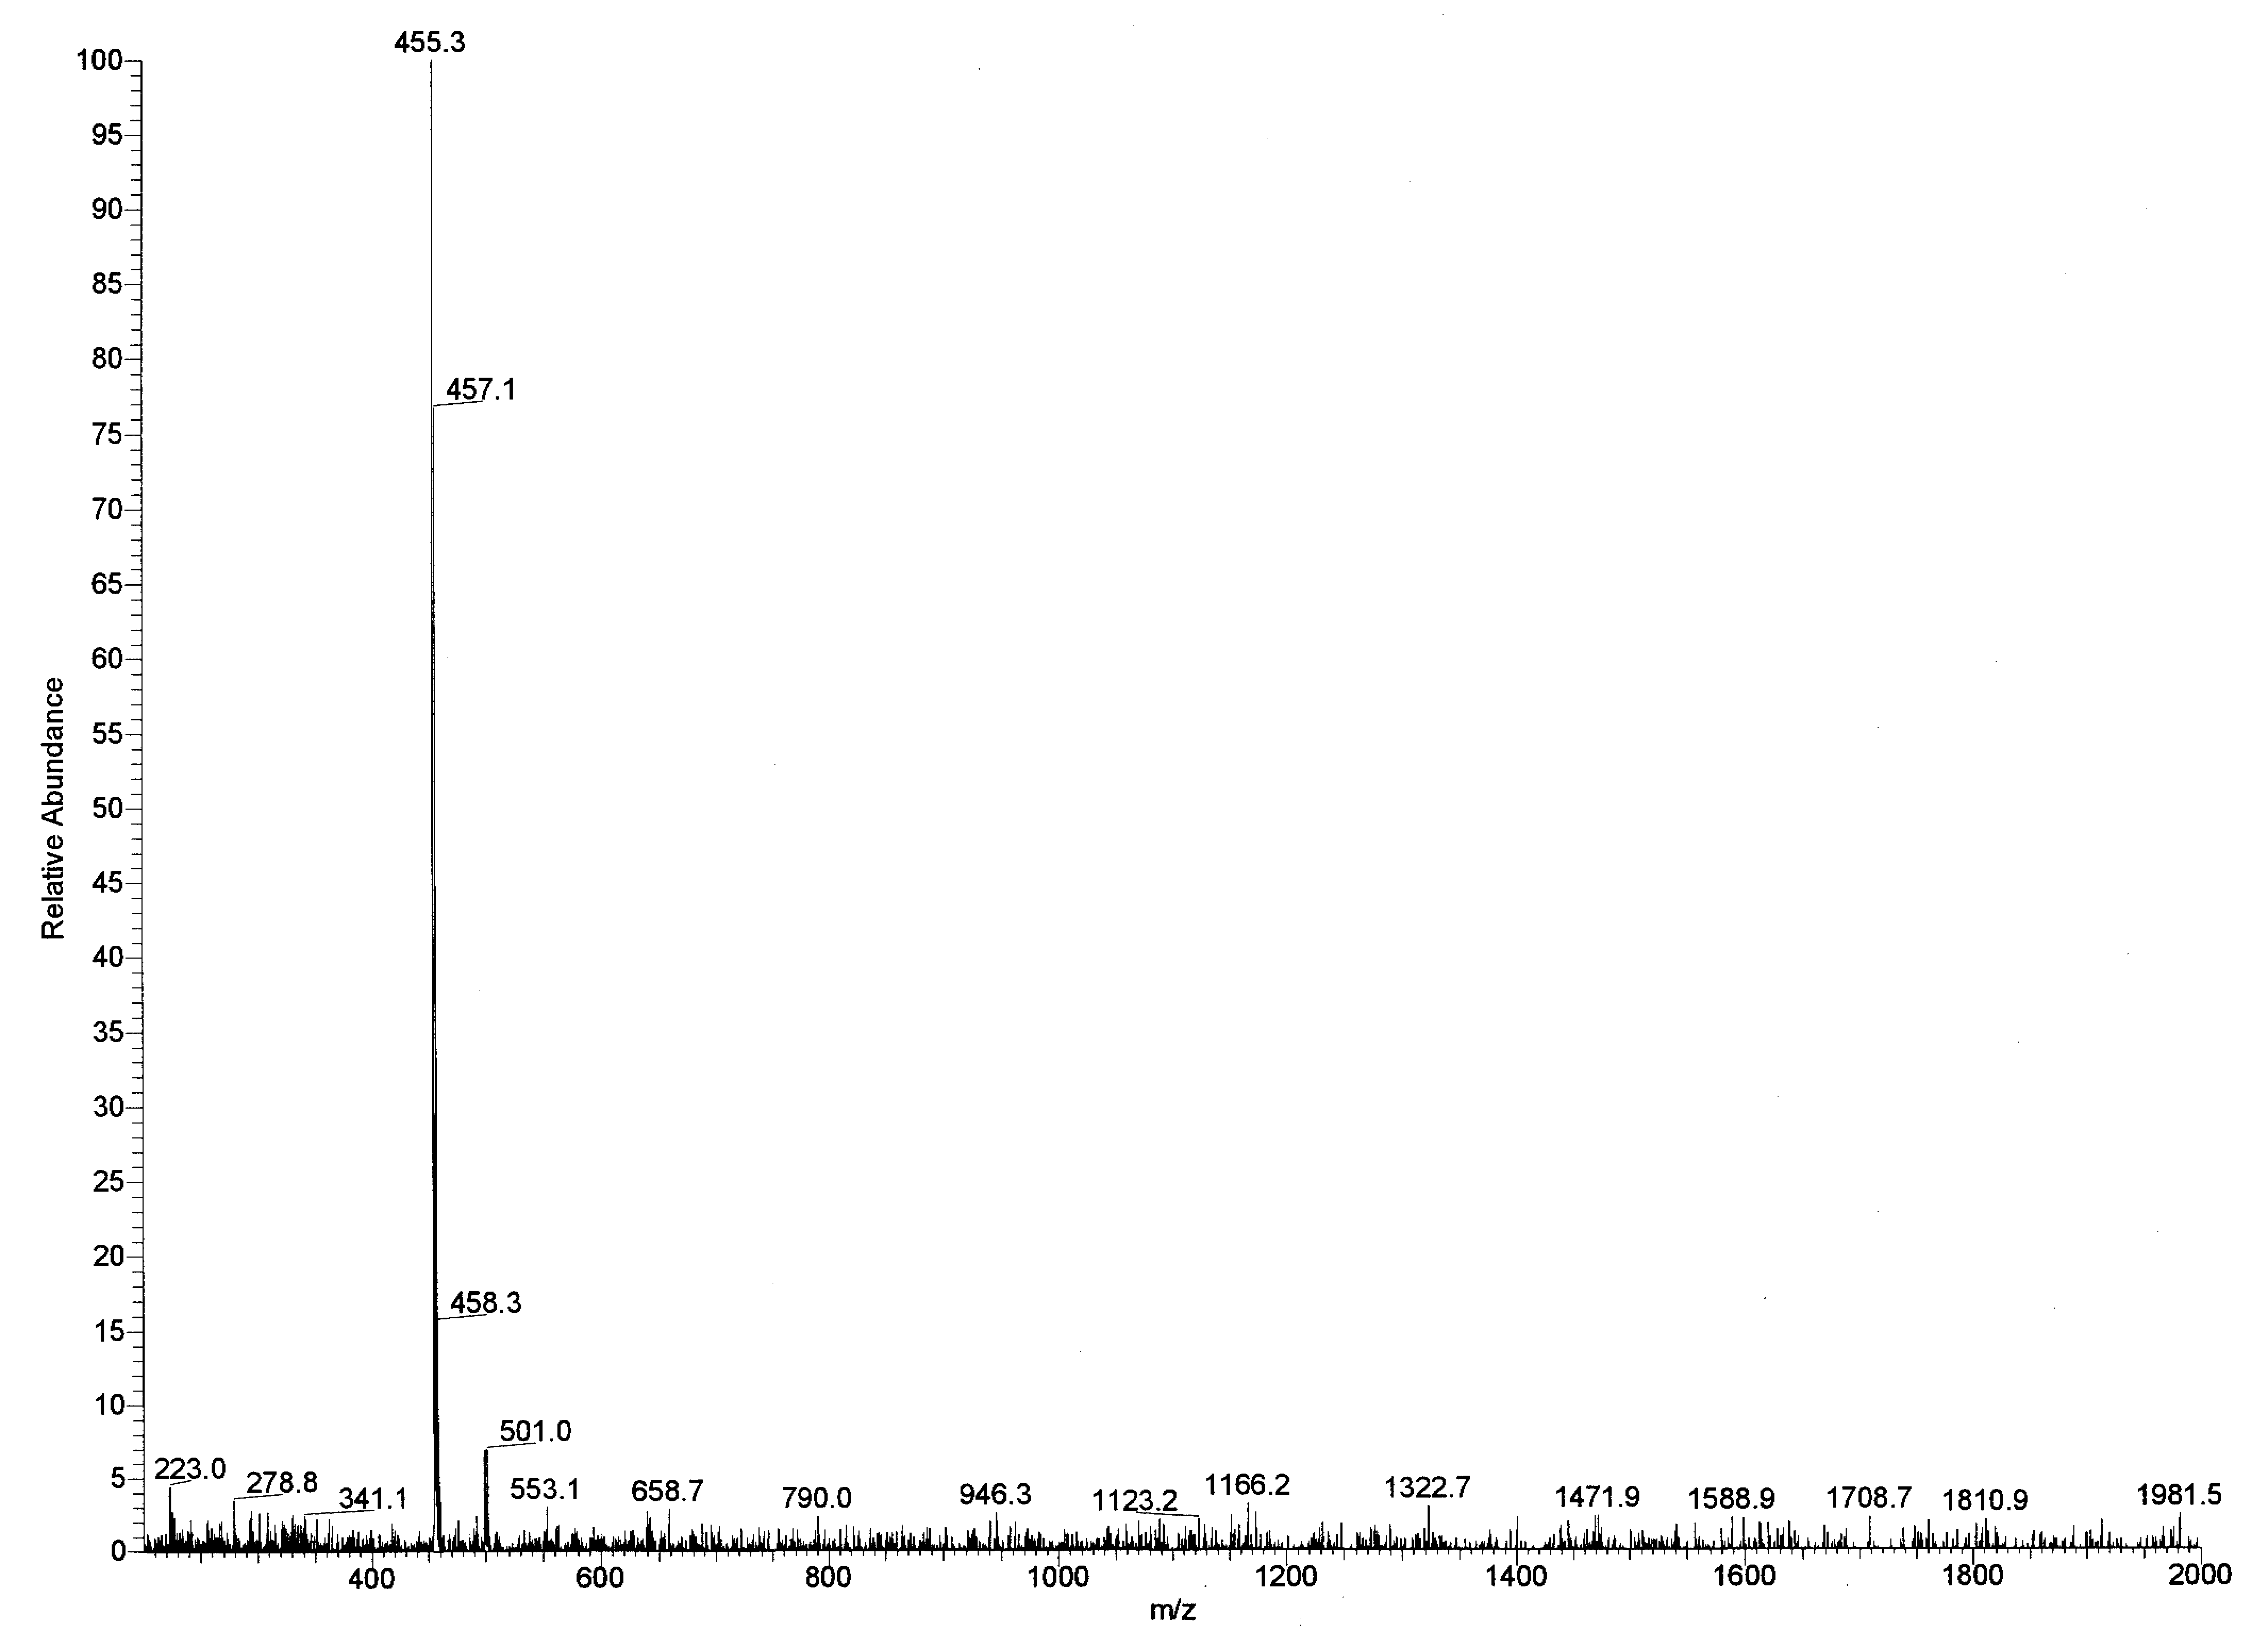


(s4)


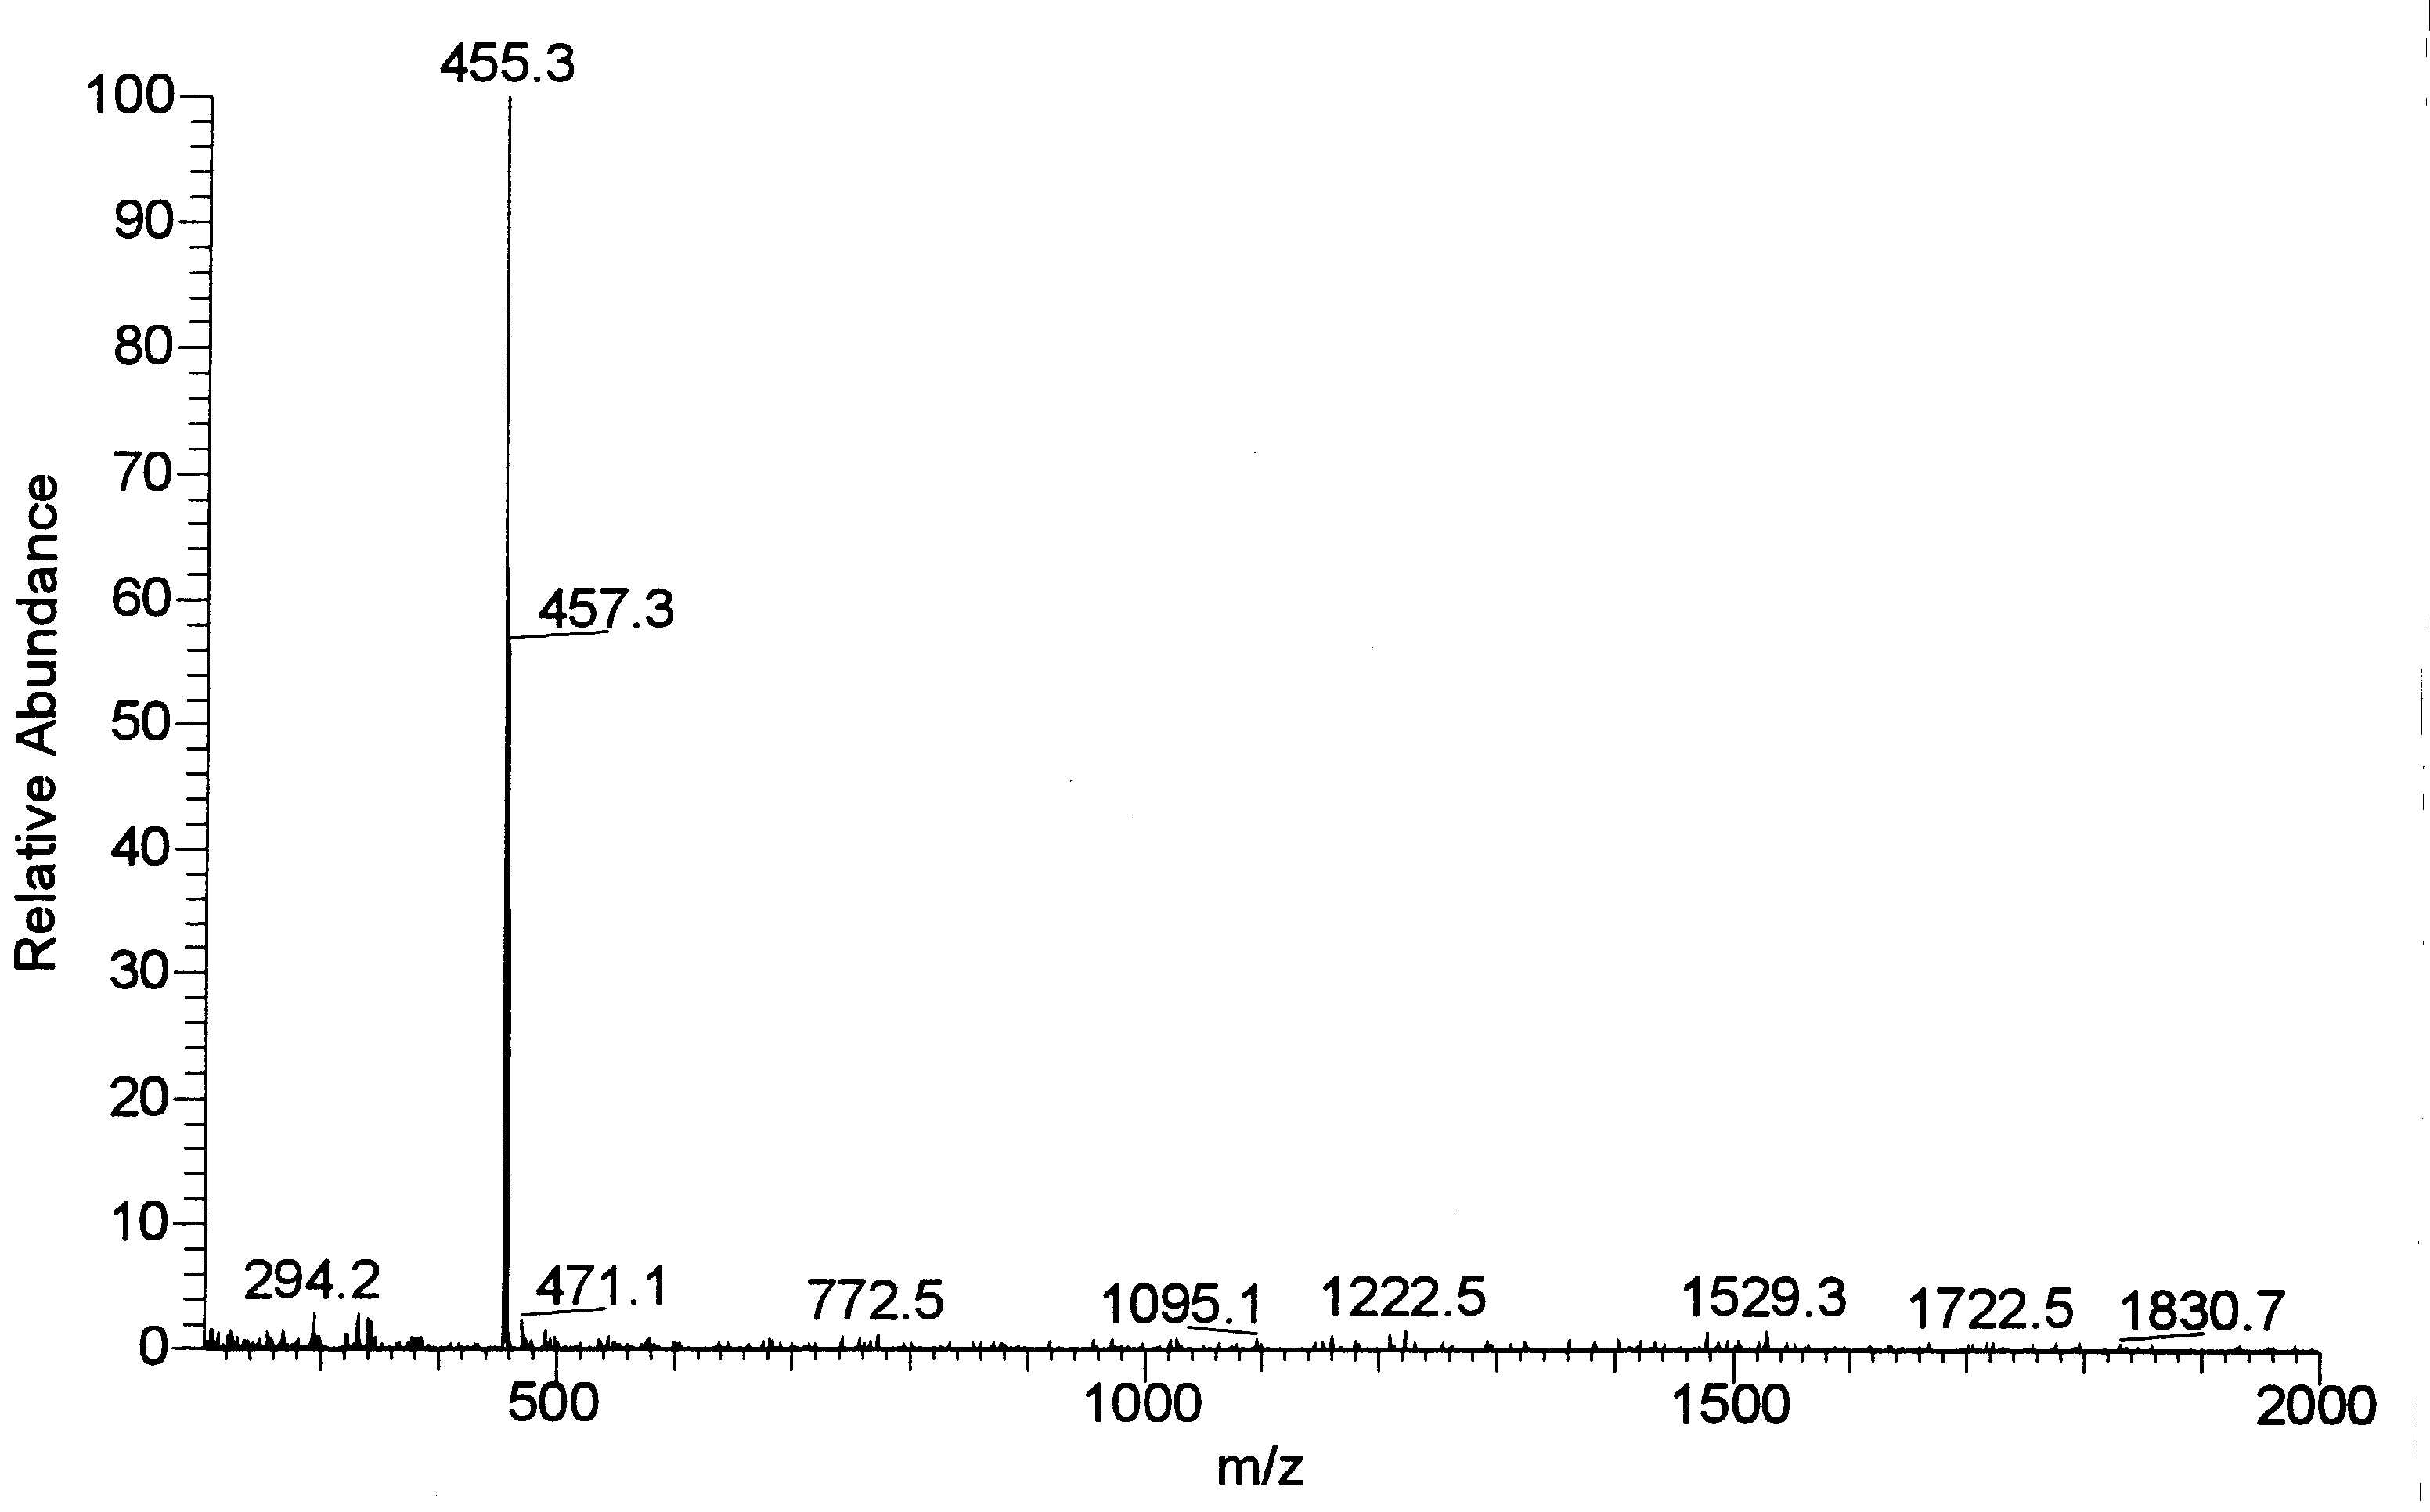


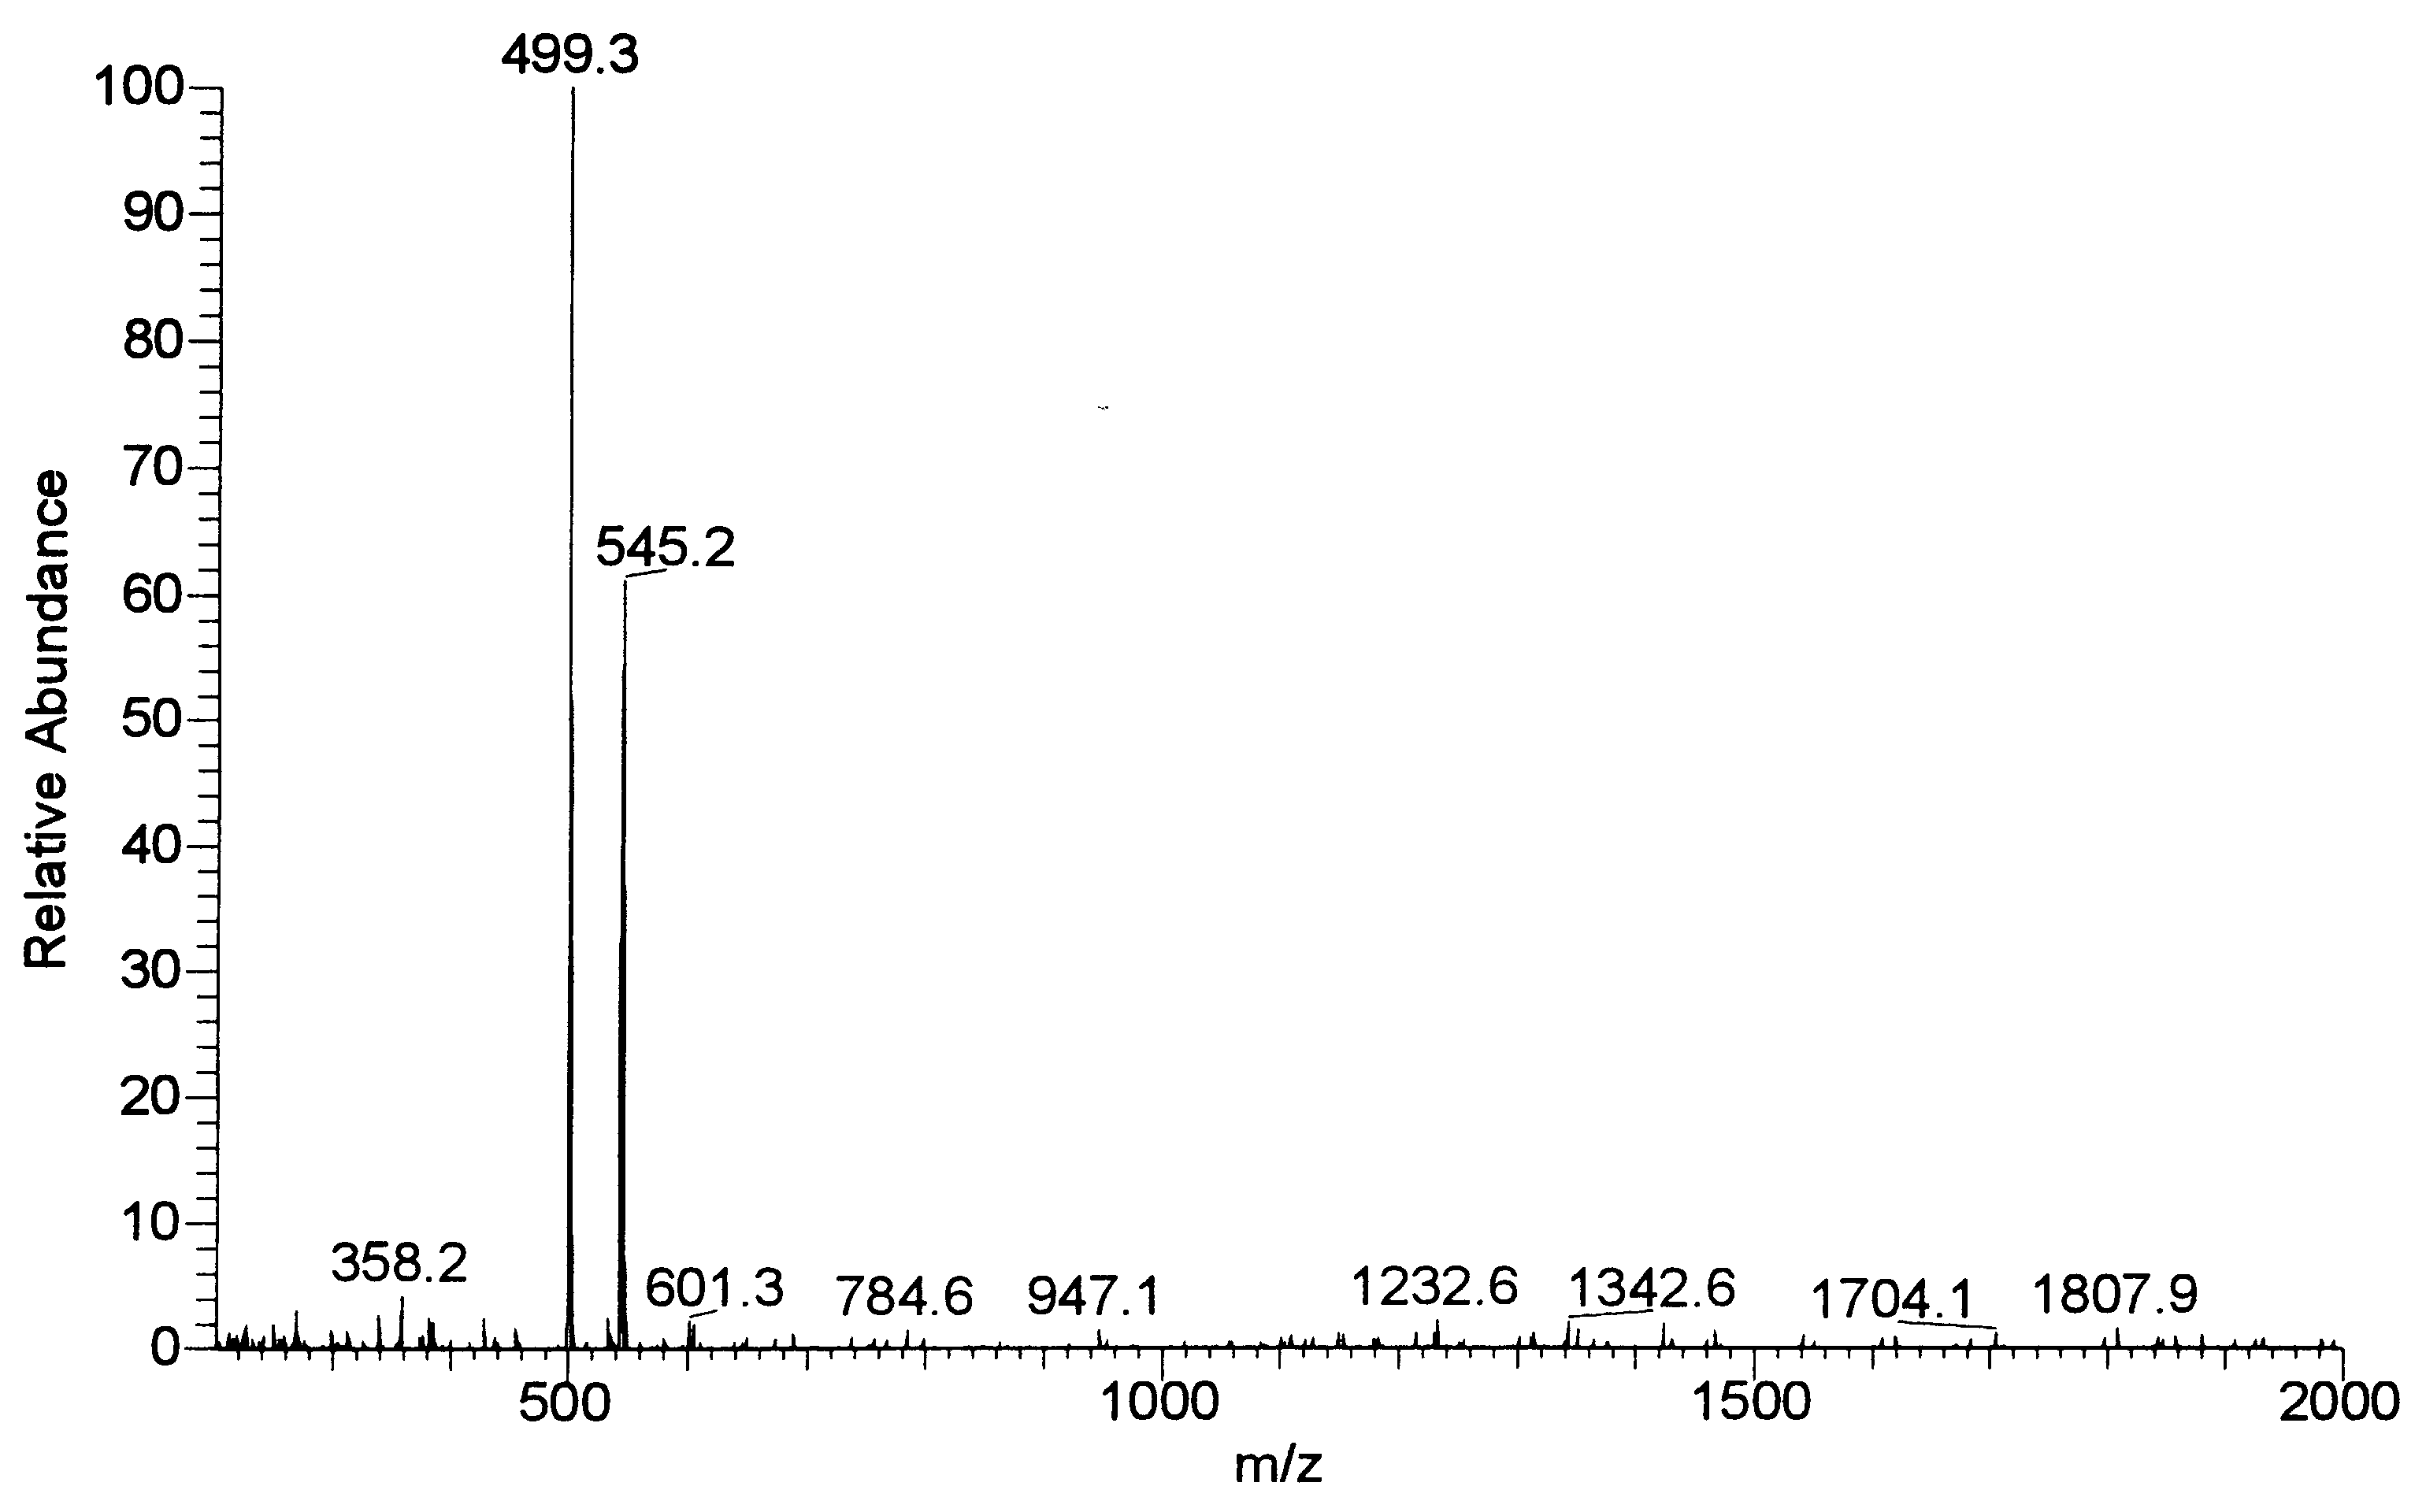
 (s5)


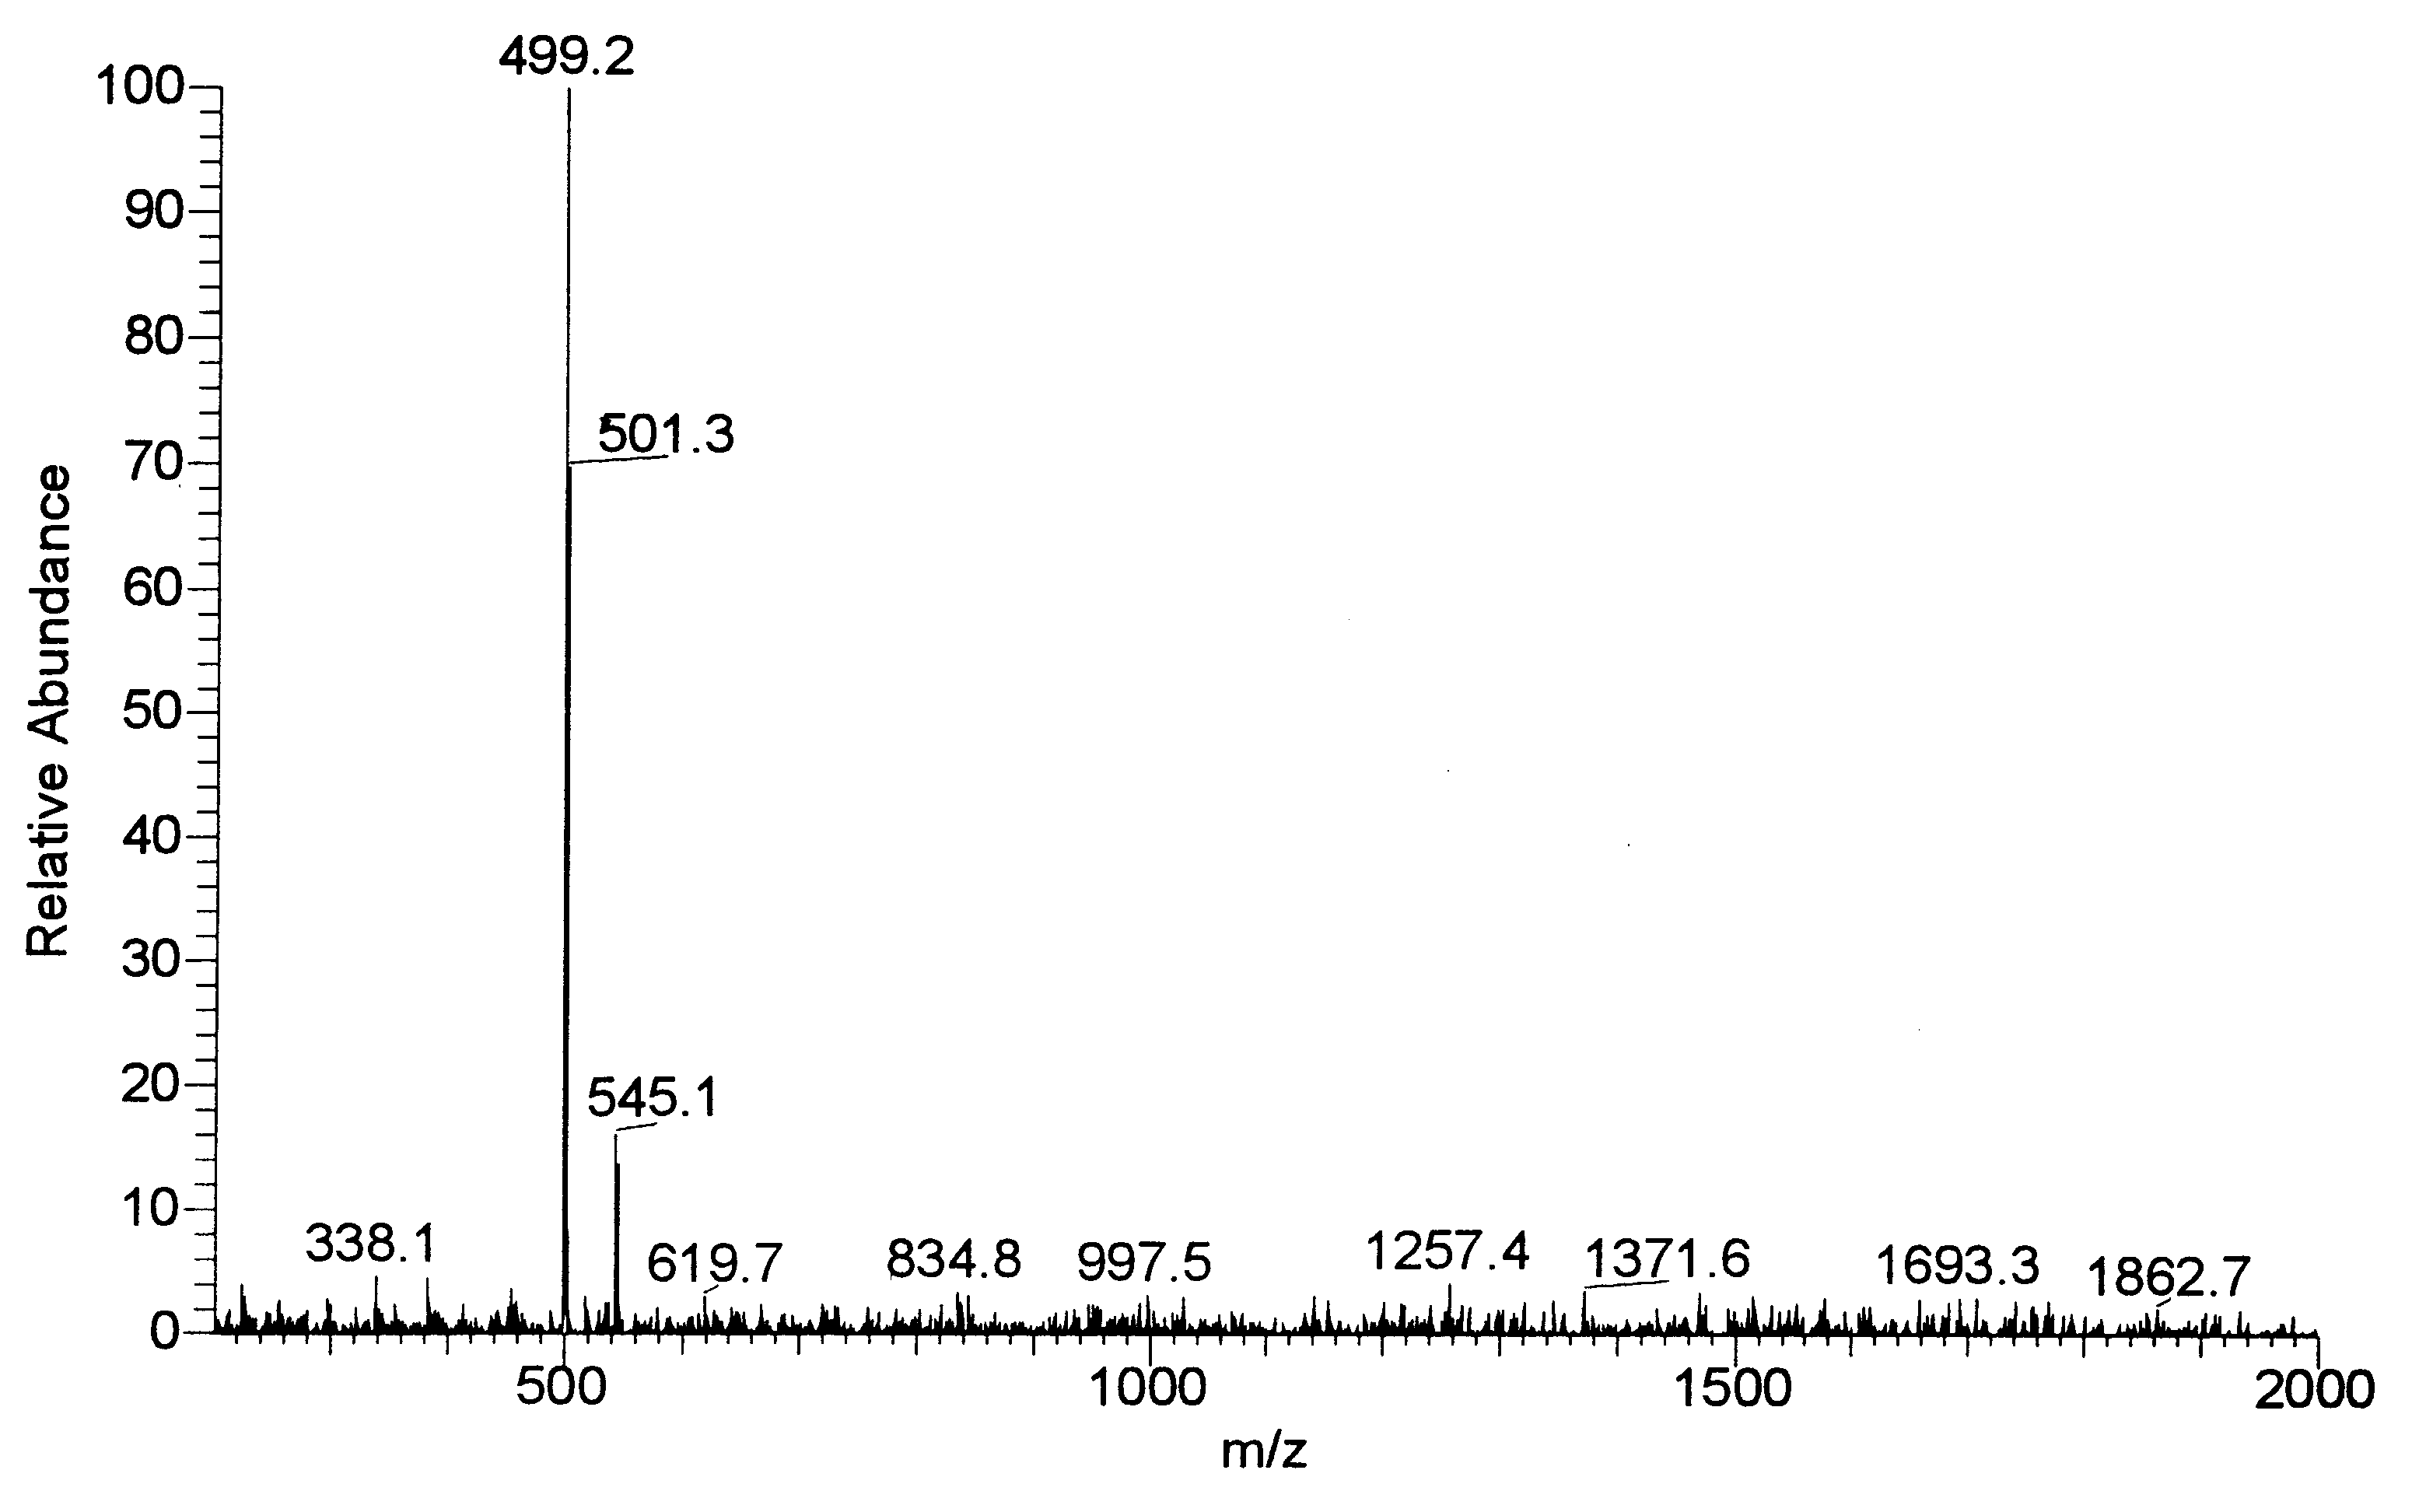
 (s6)


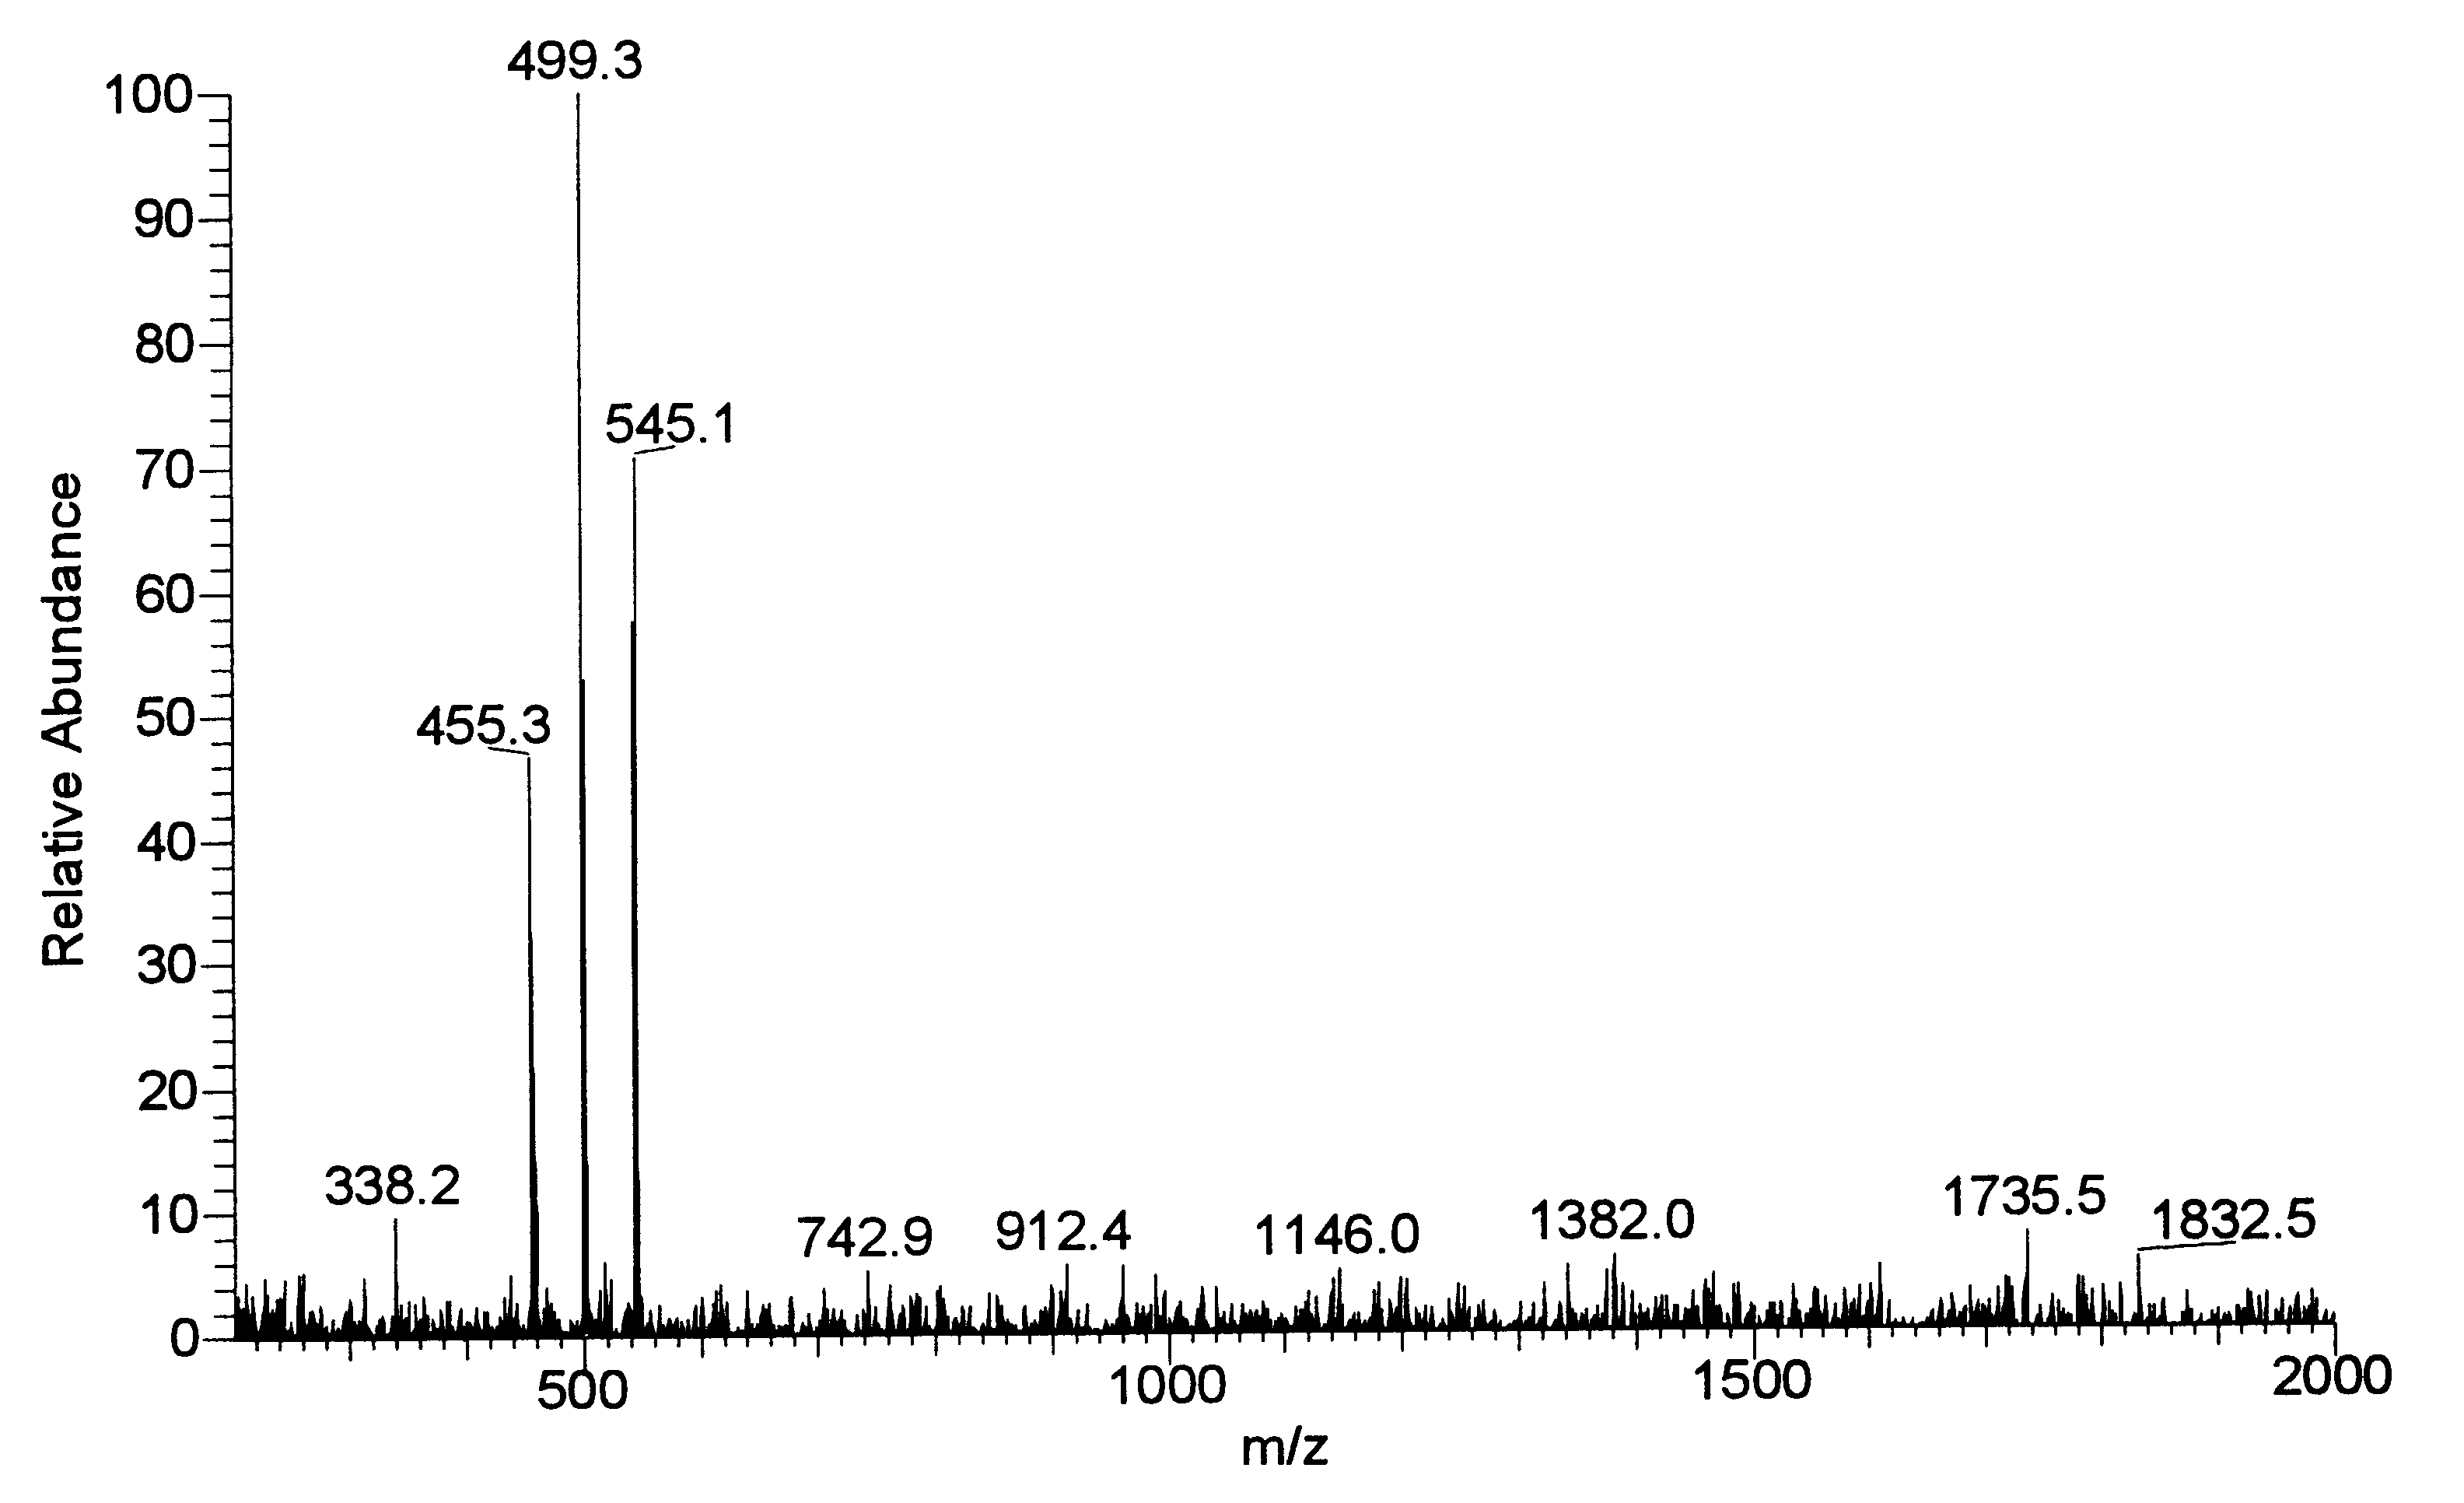
 (s7)

Fig. s8. Two-dimensional layer in **4** formed *via* OO hydrogen bonds between [Ag4(OESQ)(ODSQ)(NO3)4] and water molecule.

# 
